# Supplementary material for: Identifying mRNAs Residing in Myelinating Oligodendrocyte Processes as a Basis for Understanding Internode Autonomy
Source: MDPI journal article supplement (doi:10.3390/life13040945), 2023-04-04
Supplement: s1 [file s1]

## Supplementary data

**Table S1.** Real-time PCR primers used in this study.

| mRNA             | Acc. #         | Forward primer        | Reverse primer         | Size |
|------------------|----------------|-----------------------|------------------------|------|
| <i>MBP</i>       | K00512         | CACAGAGACACGGGCATCC   | CTGGGTTTTTCATCTTGGGTCC | 154  |
| <i>MOBP-81A</i>  | X87900         | AACGCTGTGCATGTGTTAGC  | AACGCTGTGCATGTGTTAGC   | 130  |
| <i>PLP1</i>      | NM_030990      | GTGTTTCTTTGGAGTGGCAC  | GGCCCCATAAAGGAAGAAGA   | 181  |
| <i>MOBP-81B</i>  | X89637         | GGGAATGGGTCTTTTGGTTT  | AGAGAGGGGAATTGGAAGGA   | 164  |
| <i>CNP</i>       | M18630         | GTCTRGACGAGGACCTGGCT  | TAGTCGCCACGCGTCTTG     | 161  |
| <i>UGT8A</i>     | NM_019276      | CCACCTCAGATGCTTTCCTG  | GTTGCCAACCATCATGTCAC   | 122  |
| <i>MOG</i>       | NM_022668      | GCAGGTCYCTGTAGGCCTTG  | GGGCACYCTCAGGAAGTGAG   | 115  |
| <i>SLC44A1</i>   | NM_001033852.1 | CTGCTGCAGCTCCGCCTC    | GTCTGTGCAGCTACGGTCCT   | 76   |
| <i>CSPG4</i>     | NM_031022      | GACCCTCGTCACCTGCTCTA  | ATTCCAGCATTCACCTCAG    | 126  |
| <i>PDGFRA</i>    | NM_012802      | GGTCTTATGGCGTTCTGCTC  | CCATCCTGTATCCGCTCTTG   | 111  |
| <i>NEFL</i>      | NM_031783      | GCCGAAGAGTGGTTCAAGAG  | TGTCTGCATTCTGCTTGTCC   | 150  |
| <i>TUBB3</i>     | NM_139254      | CTCCCGGGTTAAAGTCCTTC  | CAGGCCTGGAGCCATAATAA   | 127  |
| <i>AQP4</i>      | NM_012825      | CGGTTTCATGGAAACCTCACT | TCAGTCCGTTTGGGAATCACA  | 106  |
| <i>GFAP</i>      | NM_017009      | CCTGCCAGGGTRGACTTCTC  | TGTAGCTAGCAAAGCGGTCA   | 112  |
| <i>APOD</i>      | NM_012777      | CGGTGCAAGAGAATTTTCGAT | GGACGCAGCTCCTTGTTTAG   | 154  |
| <i>DYNC1LI2</i>  | NM_145772      | CTGCTGGGTGARGATGGAG   | CCTTTGTGGTAYAGATCTCC   | 176  |
| <i>ENPP2</i>     | NM_012848      | TCCCCACCCACTACTACAGC  | AAGTGGGCCAGAACTACCAC   | 187  |
| <i>GSN</i>       | NM_001004080   | GGTCTTTGTCTGGGTTGGAA  | AAAGGAAGGAGGCTCAAAGC   | 151  |
| <i>KIF1A</i>     | XM_343630      | GAGGATGAAGTCCAATGGAC  | TAGCTCCAGACTGATGGCR    | 150  |
| <i>LPAR1</i>     | NM_053936      | ATTTTCACAGCCCCAGTTCAC | GTTGACGTARATTGCCACCA   | 201  |
| <i>MAPK8IP1</i>  | NM_053777      | CTGAAGACAGGGGAGCAGAC  | ATTCGATCTCGATGGGAGTG   | 208  |
| <i>NDRG1</i>     | NM_133583      | ATGCCGTGGTGGAAATGTAAT | CGAGACAGGCGAGTCATACA   | 175  |
| <i>PADI2</i>     | NM_017226      | GAACCTGGTGGAGAAAACCA  | GCACTACTGGGAAGCCTTTG   | 131  |
| <i>SH3GL3</i>    | AF009604       | GGTGAGGCCCTGAAACTCA   | CCTCGGGGATCTTACCYAC    | 190  |
| <i>TPPP</i>      | XM_341746      | CCAAGGCTGCTAAGAGGTTG  | CTTGCTGAAGACGATGTCCA   | 417  |
| <i>TRAK2</i>     | NM_163550      | GATGTCAGAGGAGGCTCACC  | AGTGCACTGAGCACACACCT   | 151  |
| <i>TRP53INP2</i> | XM_00106397    | GCCTTTGTCTCTGAGGAGGA  | ACAAACCAGCTCTCGTCCAT   | 149  |
| <i>GAPDH</i>     | NM_017008      | TGCCACTCAGAAGACTGTGG  | TTGAGCTCTGGGATGACCTT   | 129  |

Legend: Primer 3 (<https://bioinfo.ut.ee/primer3-0.4.0/>) was used to select PCR primers to each mRNA. Each primer pair was analyzed with conventional PCR with cDNA prepared from P60 rat cerebral cortex total RNA as template to ensure that single appropriately sized products were obtained. Knowing that the primers amplified the correct mRNA specific products, they were used in the RT-qPCR analyses. Color coding used throughout reference mRNAs located in oligodendrocyte processes (*MSAS/OL-P*),

oligodendrocyte soma (**OL-S**), newly-formed oligodendrocytes (**NFO**), oligodendrocyte precursor cells (**OPC**), neurons (**NE**), astrocytes (**AST**). Putative **MSAS** mRNAs are listed as is *GADPH* used to normalize results.

**Table S2.** Expression patterns of cell-type specific mRNAs – MBRS data.

| #    | Gene           | OPC        | NFO          | MO           | NE         | AST        | MG          | EP          | %MO/CT       | %NFO        | %OPC        | %OL         | MO/NFO     |
|------|----------------|------------|--------------|--------------|------------|------------|-------------|-------------|--------------|-------------|-------------|-------------|------------|
| MO1  | <i>MBP</i>     | 271        | <b>26708</b> | <b>95398</b> | 12         | 2          | 175         | 1           | <b>77.8</b>  | <b>21.8</b> | <b>0.2</b>  | <b>99.8</b> | <b>3.6</b> |
| MO2  | <i>MOBP</i>    | 8          | <b>1214</b>  | <b>2543</b>  | 0          | 0          | 3           | 0           | <b>67.5</b>  | <b>32.2</b> | <b>0.1</b>  | <b>99.9</b> | <b>2.1</b> |
| MO3  | <i>MAL</i>     | 4          | <b>761</b>   | <b>2574</b>  | 0          | 1          | 1           | 26          | <b>76.4</b>  | <b>22.6</b> | <b>0.1</b>  | <b>99.2</b> | <b>3.4</b> |
| NFO1 | <i>GPR17</i>   | <b>441</b> | <b>930</b>   | 67           | 6          | 0          | 1           | 0           | 4.6          | <b>64.3</b> | <b>30.5</b> | <b>99.5</b> | <b>0.1</b> |
| NFO2 | <i>MYRF</i>    | 8          | <b>178</b>   | <b>118</b>   | 1          | 0          | 0           | 0           | <b>38.7</b>  | <b>58.3</b> | <b>2.6</b>  | <b>99.6</b> | <b>0.7</b> |
| OPC1 | <i>PDGFRA</i>  | <b>596</b> | <b>80</b>    | 1            | 9          | 0          | 1           | 28          | <b>0.6</b>   | <b>11.1</b> | <b>83.5</b> | <b>94.7</b> | --         |
| OPC2 | <i>CSPG4</i>   | <b>117</b> | <b>23</b>    | 0            | 9          | 1          | 0           | 4           | <b>0.2</b>   | <b>15.0</b> | <b>76.0</b> | <b>91.1</b> | --         |
| NE1  | <i>STMN2</i>   | 9          | 2            | 6            | <b>387</b> | 3          | 6           | 2           | <b>92.3*</b> | --          | --          | --          | --         |
| NE2  | <i>TUBB3</i>   | 14         | 6            | 17           | <b>339</b> | 2          | 5           | 4           | <b>87.6*</b> | --          | --          | --          | --         |
| AST1 | <i>AQP4</i>    | 11         | 1            | 11           | 12         | <b>318</b> | 0           | 2           | <b>91.9*</b> | --          | --          | --          | --         |
| AST2 | <i>ALDH1L1</i> | 6          | 0            | 3            | 8          | <b>145</b> | 4           | 2           | <b>86.4*</b> | --          | --          | --          | --         |
| MG1  | <i>C1QA</i>    | 2          | 2            | 96           | 7          | 21         | <b>3988</b> | 0           | <b>96.9*</b> | --          | --          | --          | --         |
| EP1  | <i>CLDN5</i>   | 4          | 0            | 2            | 8          | 11         | 11          | <b>3437</b> | <b>98.9*</b> | --          | --          | --          | --         |

\*Represent percentage expression by NE (\*), AST (\*), MG (\*) and EP (\*).

Legend: Cell-type-specific expression patterns of mRNAs highly expressed by myelinating oligodendrocytes (**MO1-MO3**), newly formed oligodendrocytes (**NFO1-NFO2**), oligodendrocyte precursor cells (**OPC1-OPC2**), neuron (**NE1-NE2**), astrocyte (**AST1-AST2**), microglia (**MG1**) and ependymal cell (**EP1**). Values in Fragments Per Kilobase of transcript per Million mapped reads (FPKM). Maximum expression values plus those falling within 10% of the maximum value are in bold and colored based on cell type. Percentages expressed by **MO/CT** (**%MO/CT**), **NFO** (**%NFO**), **OPC** (**%OPC**) and oligodendrocyte lineage (**%OL**, **%OPC+%NFO+%MO**) are given in marked columns as well as **MO/NFO** for MOs and NFOs. These mRNAs were used to identify cell-type-specific expression patterns in AMBA and AMSCA images (Figure 3).

**Table S3.** Links of cell-type specific mRNAs - AMBA, AMSCA and ADMBA data.

| #    | mRNA                     | Br sagittal              | Br coronal               | SC – P56                                 | SC – P4                                  | Dev Brain |
|------|--------------------------|--------------------------|--------------------------|------------------------------------------|------------------------------------------|-----------|
| MO1  | <i>MBP</i>               | <a href="#">79632288</a> | <a href="#">12202838</a> | <a href="#">100001620<sup>wm</sup></a>   | <a href="#">100001621<sup>wm</sup></a>   | ++        |
| MO2  | <i>MOBP</i> <sup>1</sup> | <a href="#">69174034</a> | --                       | <a href="#">100017643<sup>wm</sup></a>   | <a href="#">100017644<sup>wm</sup></a>   | ++        |
| MO3  | <i>MAL</i>               | <a href="#">386243</a>   | --                       | <a href="#">100006019<sup>wm</sup></a>   | <a href="#">100006018<sup>wm</sup></a>   | --        |
| NFO1 | <i>GPR17</i>             | <a href="#">73513814</a> | <a href="#">74641313</a> | <a href="#">100032104<sup>wm</sup></a>   | <a href="#">100032105<sup>wm</sup></a>   | --        |
| NFO2 | <i>MYRF</i> <sup>2</sup> | <a href="#">70295805</a> | --                       | <a href="#">100026205<sup>wm</sup></a>   | <a href="#">100026206<sup>wm</sup></a>   | --        |
| OPC1 | <i>PDGFRA</i>            | <a href="#">79354743</a> | <a href="#">77280309</a> | <a href="#">100003956</a>                | <a href="#">100003955</a>                | ++        |
| OPC2 | <i>CSPG4</i>             | <a href="#">69608160</a> | --                       | <a href="#">100020669</a>                | <a href="#">100020670</a>                | --        |
| NE1  | <i>STMN2</i>             | <a href="#">68632984</a> | <a href="#">74819695</a> | <a href="#">100013852</a>                | <a href="#">100013853</a>                | --        |
| NE2  | <i>TUBB3</i>             | <a href="#">68196914</a> | --                       | <a href="#">100013057</a>                | <a href="#">100013058</a>                | ++        |
| AST1 | <i>AQP4</i> <sup>3</sup> | <a href="#">109</a>      | <a href="#">108</a>      | <a href="#">100002844<sup>ra</sup></a>   | <a href="#">100002845<sup>ra</sup></a>   | ++        |
| AST2 | <i>ALDH1L1</i>           | <a href="#">1725</a>     | <a href="#">1724</a>     | <a href="#">100001676</a>                | <a href="#">100001677<sup>vdra</sup></a> | --        |
| MG1  | <i>C1QA</i> <sup>4</sup> | <a href="#">68191456</a> | <a href="#">79591671</a> | <a href="#">100015379<sup>lmgm</sup></a> | <a href="#">100018950</a>                | ++        |
| EP1  | <i>CLDN5</i>             | <a href="#">79360268</a> | <a href="#">79490120</a> | <a href="#">100002146<sup>vl</sup></a>   | <a href="#">100002147<sup>vl</sup></a>   | ++        |

<sup>1</sup>*MOBP* mRNA – additional sagittal section: [769201510](#), <sup>2</sup>*MYRF* mRNA – two additional sagittal sections ([71161357](#), [71764437](#)), <sup>3</sup>*AQP4* mRNA – additional sagittal ([77454660](#)) and coronal ([79556722](#)) sections, and <sup>4</sup>*C1QA* mRNA – additional sagittal section ([77923147](#)).

Legend: Links of the three MO-, two NFO-, two OPC-, two neuron-, two astrocyte-, one microglia- and one ependymal cell mRNA used to obtain AMBA and AMSCA images examined in Figure 3 are given. If images were present in the Allen Developing Mouse Brain Atlas (ADMBA), they were indicated (++). In the AMSCA data sets where an expression category is assigned, the category is included as a superscript following the accession number. Categories: **cc** – central canal, **gm** – gray matter, **ra** – white matter and radially arrayed white matter, **gw** – gray matter and white matter, **lm** – lamina 1-x and gray matter, **rv** – radial arrayed and vascular like in gray and white matter, **vd** – ventral-dorsal midline in gray matter, **vl** – vascular-like in gray and **wm** – white matter.

**Table S4.** Links to *MSAS* mRNAs – AMBA, AMSCA and AMDMB data.

| #      | mRNA                      | Brain - sagittal         | Brain - coronal          | SC – P56                                 | SC – P4                                    | Dev |
|--------|---------------------------|--------------------------|--------------------------|------------------------------------------|--------------------------------------------|-----|
| MSAS1  | <i>LPAR1</i> <sup>1</sup> | <a href="#">75749420</a> | <a href="#">79556595</a> | <a href="#">100037166<sup>wm</sup></a>   | <a href="#">100037167<sup>wm</sup></a>     | --  |
| MSAS2  | <i>TRP53INP2</i>          | <a href="#">70192081</a> | --                       | <a href="#">100024314</a>                | <a href="#">100024315</a>                  | --  |
| MSAS3  | <i>TRAK2</i> <sup>2</sup> | <a href="#">75990672</a> | --                       | <a href="#">100051344</a>                | <a href="#">100051345</a>                  | --  |
| MSAS4  | <i>TPPP</i> <sup>3</sup>  | <a href="#">69407355</a> | <a href="#">74724775</a> | <a href="#">100018955<sup>wm</sup></a>   | <a href="#">100018956<sup>wm</sup></a>     | --  |
| MSAS5  | <i>SH3GL3</i>             | <a href="#">79632219</a> | --                       | <a href="#">100002780 (ne)</a>           | <a href="#">100002781</a>                  | --  |
| MSAS6  | <i>GSN</i>                | <a href="#">68444642</a> | <a href="#">72081395</a> | <a href="#">100011054<sup>wm</sup></a>   | <a href="#">100011055<sup>wm</sup></a>     | --  |
| MSAS7  | <i>APOD</i>               | <a href="#">71380893</a> | --                       | <a href="#">100020110<sup>wmvl</sup></a> | <a href="#">100020111<sup>wmvl</sup></a>   | ++  |
| MSAS8  | <i>MAPK8IP1</i>           | <a href="#">68148737</a> | --                       | <a href="#">100022617</a>                | <a href="#">100022618</a>                  | --  |
| MSAS9  | <i>KIF1A</i>              | <a href="#">69735759</a> | --                       | <a href="#">100030717</a>                | <a href="#">100030718</a>                  | --  |
| MSAS10 | <i>ENPP2</i> <sup>4</sup> | <a href="#">532631</a>   | <a href="#">70613967</a> | <a href="#">100001398<sup>wm</sup></a>   | <a href="#">100001399<sup>wm</sup></a>     | --  |
| MSAS11 | <i>NDRG1</i>              | <a href="#">70429303</a> | --                       | <a href="#">100039463<sup>wm</sup></a>   | <a href="#">100039464<sup>wmlmgm</sup></a> | --  |
| MSAS12 | <i>DYNC1LI2</i>           | <a href="#">69627027</a> | --                       | <a href="#">100022042</a>                | <a href="#">100022043</a>                  | --  |
| MSAS13 | <i>PADI2</i>              | <a href="#">69013438</a> | --                       | --                                       | --                                         | --  |
| MSAS14 | <i>CAR2</i>               | <a href="#">69014434</a> | <a href="#">72103831</a> | <a href="#">100016060<sup>wm</sup></a>   | <a href="#">100016061<sup>wm</sup></a>     | --  |
| MSAS15 | <i>CRYAB</i>              | <a href="#">72182998</a> | <a href="#">74357575</a> | <a href="#">100008586<sup>wm</sup></a>   | <a href="#">100008585</a>                  | --  |

<sup>1</sup>*LPAR1* is listed as *EDG2*, an additional sagittal image series - [79360278](#), <sup>2</sup>*TPPP* is listed in ASCA as 2900041A09Rik, <sup>3</sup>*TRAK2* mRNA – an additional P56 spinal cord image series:

[100039894](#), <sup>4</sup>*ENPP2* mRNA – an additional brain coronal image series - [77413700](#)

Legend – *MSAS* mRNAs are ordered based on enrichment in myelin vesicles and are color coded according to enrichments. **MSAS1 – MSAS5** were enriched at levels suggesting locations in *MSAS*. **MSAS6 – MSAS9** were enriched at levels suggesting locations of oligodendrocyte somata. **MSAS10 – MSAS11** were not enriched in myelin (Figure 1). *MSAS12 – MSAS13* were not present at levels sufficient to determine enrichment. *MSAS14 – MSAS15* were not examined. All *MSAS* mRNAs were obtained from the AMBA (<https://mouse.brain-map.org/>) and AMSCA (<http://mousespinal.brain-map.org/>) databases. With the exception of *APOD* mRNA, *MSAS* mRNAs are not found in the Allen Developing Mouse Brain Atlas (<http://developingmouse.brain-map.org>). Hyperlinks to available data sets are shown.

Expression categories from spinal cord image sets as indicated in Table 4S. *SH3GL3* mRNA is not expressed (ne) in P56 spinal cord.
